# Supplementary material
Source: Research Square preprint supplement (doi:10.21203/rs.3.rs-8937826/v1)
Supplement: Supplementary file 1 [file c8a802ff1d62b7259af81b58.docx]

**Table 1. *Lactiplantibacillus plantarum* WCFS1Phage region and size using 3 different Analysis Tool.**

Genomic prophage regions predicted in the complete genome of *Lactiplantibacillus plantarum* WCFS1 by three independent tools (PHASTEST, PhageBoost, and Phigaro) are shown. Overlapping regions identified by multiple tools are highlighted with the same color.

| **Analysis Tool** | **Phage Region (bp)** | **Size** |
| --- | --- | --- |
| **PHASTEST** | (1) 589,962 – 631,783 bp | 41,822 bp |
| (2) 1,083,489 – 1,105,644 bp | 22,156 bp |
| (3) 2,163,794 – 2,218,539 bp | 54,746 bp |
| **PhageBoost** | (1) 338,885 – 355,981 bp | 17,096 bp |
| (2) 359,163 – 374,639 bp | 15,476 bp |
| (3) 586,639 – 631,351 bp | 44,712 bp |
| (4) 1,083,489 – 1,089,903 bp | 6,414 bp |
| (5) 1,094,804 – 1,105,604 bp | 10,800 bp |
| (6) 1,801,149 – 1,815,812 bp | 14,663 bp |
| (7) 2,150,891 – 2,224,800 bp | 73,909 bp |
| (8) 2,820,823 – 2,827,495 bp | 6,672 bp |
| (9) 2,993,904 – 3,007,279 bp | 13,375 bp |
| **Phigaro** | (1) 604,367 - 630,098 bp | 25,732 bp |
| (2) 2,164,302 – 2,215,537 bp | 51,236 bp |

**Table 2. Predicted prophage regions of *Lactiplantibacillus plantarum* WCFS1.**

Cross-validation of three prophage prediction tools (PHASTEST, Phigaro, PhageBoost) identified two intact prophages, two cryptic prophages, and five non-phage genomic islands. Classification was performed based on the presence and synteny of hallmark phage genes.

| **Classification** | | **Predicted Tool (Regions)** | **Key features** |
| --- | --- | --- | --- |
| **Intact prophages** | **IP1** | PHASTEST (1)  Phigaro (1)  PhageBoost (3) | Integrase, att sites, complete structural module (terminase, portal, capsid, tail, tape measure), holin |
| **IP2** | PHASTEST (3)  Phigaro (2)  PhageBoost (7) | Terminase, portal, capsid, tail fibers, tape measure, holin, *CI/Cro/LexA* regulators; embedded tRNA cluster |
| **Cryptic prophages** | **CP1** | PHASTEST (2)  PhageBoost (5) | Integrase (*insK*), exopolysaccharide genes *(mshA, cps2G*), *RelB/DinJ* TA system; no structural/lytic genes |
| **CP2** | PhageBoost (9) | Integrase (*xerC*), CI-like repressor, helicase, DNA replication proteins; structural genes absent |
| **Non-phage genomic islands** | **GI1** | PhageBoost (1) | *glpK, glpO, glpF* (glycerol metabolism) |
| **GI2** | PhageBoost (2) | Plantaricin bacteriocin cluster (*plnA, plnB, plnQ*) |
| **GI3** | PhageBoost (4) | *rfbA, rmlB* (rhamnose biosynthesis) |
| **GI4** | PhageBoost (6) | *prmA,* DNA glycosylase (DNA repair enzymes) |
| **GI5** | PhageBoost(8) | *baiE* (7α-dehydratase), *bmr3* (bile transporter) |

**Table 3. Cross-validation of prophage regions predicted by PHASTEST and Phigaro in *Lactiplantibacillus plantarum* WCFS1.**

Overlapping regions predicted by both tools were merged into consensus prophage regions and annotated. Each row represents a representative gene, with PHASTEST and Phigaro annotations. Each genomic coordinates are indicated. Hallmark phage genes (e.g., integrase, terminase, portal, head, tail, holin) are selected, serving as key criteria to classify intact versus cryptic prophages.

| **Region** | **Gene** | **PHASTEST annotation** | **Phigaro annotation** | **Start–Stop (bp)** | **Function** |
| --- | --- | --- | --- | --- | --- |
| **PHASTEST Region1** 41,822 bp (589,962-631,783 bp) **& Phigaro Region1** 25,732 bp (604,367-630,098 bp) | Attachment site | attL / attR | NA | 589,962–589,975 / 631,770–631,783 | Integration |
| Integrase | Integrase | NA | 590,128–591,330 | Integration |
| Terminase large | Terminase | Terminase large subunit | 607,764–609,630 / 607,765–608,361 | Packaging |
| Terminase small | NA | Terminase small subunit | 606,573–607,355 | Packaging |
| Portal protein | Portal_protein | Portal protein | 609,683–611,278 | Structural |
| Scaffolding protein | NA | Scaffolding protein | 612,330–612,978 | Structural |
| Head proteins | Head_protein | Major capsid protein | 612,330–614,441 | Structural |
| Tail proteins | Tail_protein, Phage tail protein | Major tail protein | 614,759–616,299 | Structural |
| Tape measure protein | NA | Putative tape measure protein | 617,135–621,139 | Structural |
| Minor structural protein | NA | Minor structural protein | 621,846–623,744 | Structural |
| Holin | Holin | Holin | 627,739–628,351 / 628,022–628,382 | Lysis |

| **Region** | **Gene** | **PHASTEST annotation** | **Phigaro annotation** | **Start–Stop (bp)** | **Function** |
| --- | --- | --- | --- | --- | --- |
| **PHASTEST Region3** 54,746 bp (2,163,794~2,218,539 bp) **& Phigaro Region2** 51,236 bp (2,163,302-2,215,537 bp) | Attachment site | *attL / attR* | NA | 589,962–589,975 / 631,770–631,783 | Integration |
| Integrase | Integrase | NA | 590,128–591,330 | Integration |
| Terminase large | Terminase | Terminase large subunit | 607,764–609,630 / 607,765–608,361 | Packaging |
| Terminase small | NA | Terminase small subunit | 606,573–607,355 | Packaging |
| Portal protein | Portal_protein | Portal protein | 609,683–611,278 | Structural |
| Scaffolding protein | NA | Scaffolding protein | 612,330–612,978 | Structural |
| Head proteins | Head_protein | Major capsid protein | 612,330–614,441 | Structural |
| Tail proteins | Tail_protein, Phage tail protein | Major tail protein | 614,759–616,299 | Structural |
| Tape measure protein | NA | Putative tape measure protein | 617,135–621,139 | Structural |
| Minor structural protein | NA | Minor structural protein | 621,846–623,744 | Structural |
| Holin | Holin | Holin | 627,739–628,351 / 628,022–628,382 | Lysis |

*NA means not applicable PHASTEST or Phigaro annotation.

**Table 4. Genomic features and functional module assignment of key genes in *Lactiplantibacillus plantarum* WCFS1.**

Nine putative prophage regions were identified using PhageBoost. For each region, representative genes annotated by Bakta and Prokka were categorized into functional modules (metabolism, adhesion/interaction, regulatory, bacteriocin/defense, accessory/unknown, integration, packaging, structural, and lysis).

| **PhageBoost Region 1** | Metabolism | *glpK*, *glpO*, *glpF* |
| --- | --- | --- |
| Adhesion/interaction | MucBP domain-containing protein, integral membrane proteins |
| Accessory/unknown | DUF1934, Imm63 domain protein, Orphan protein, Ankyrin repeat protein, DUSP domain-containing protein |

| **PhageBoost Region2** | Metabolism | yidA, brnQ, napA |
| --- | --- | --- |
| Regulatory | rhaS, rhaR, T-box leader, agrA_1, agrA_2 |
| Bacteriocin/defense | plnA, plnB, plnJ, plnK, plnL, plnQ, sunS, Bacteriocin immunity protein |

| **PhageBoost Region3** | Regulatory | lexA/xre, cro-like HTH protein, arpU, DNA-binding proteins |
| --- | --- | --- |
| Accessory/unknown | DUF proteins (DUF3799, DUF4373, DUF2528, DUF3168, DUF4355), Hydrolase, peptidase |
| Integration | xerC, recT, Holliday junction resolvase |
| Packaging | Terminase small subunit, Terminase large subunit, Portal protein |
| Structural | Capsid protein, Mu-F domain protein, Multiple tail proteins, Tape measure protein, Baseplate component BppU-N |
| Lysis | Lysozyme |
| Metabolism | rplA, rplJ, rplK, rplL, tRNA-Gly, tRNA-Leu, tRNA-Asn |

| **PhageBoost Region4** | Metabolism | *rfbA, rmlB, rfbC, strL*, Cellulase domain-containing protein |
| --- | --- | --- |

| **PhageBoost Region5** | Metabolism | *mshA, cps2G* |
| --- | --- | --- |
| Regulatory | *epsF* (*RelB/DinJ* family antitoxin) |
| Integration | *insK* (Integrase catalytic domain-containing protein) |

| **PhageBoost Region6** | Metabolism | *prmA* (Ribosomal protein L11 methyltransferase), Putative 3-methyladenine DNA glycosylase |
| --- | --- | --- |
| Regulatory | HTH cro/C1-type domain-containing protein |
| Accessory/unknown | L51-S25-CI-B8 domain-containing protein, DUF3892 domain-containing protein |
| Integration | *tnp* (IS1182 family transposase ISP2), ISL3 family transposase ISP1, Transposase (ISL3 family) |

| **PhageBoost Region7** | Metabolism | *gatD, gmuF, yfeW, ilvE,* ABC transporters |
| --- | --- | --- |
| Adhesion/interaction | collagen-like protein, lipoproteins, TM helix proteins |
| Regulatory | *lexA/xre, cro/C1, arpU, marR* |
| Bacteriocin/defense | type I site-specific DNase, site-specific DNA-methyltransferase, 3-methyladenine DNA glycosylase, virulence protein |
| Accessory/unknown | DUF proteins, Nucleotide-binding proteins, *yxeA*, Prophage Lp1/2/3 proteins |
| Integration | Integrase (*xerC* family), Transposases (IS1182, ISL3) |
| Packaging | Terminase small/large (P27 family), Portal proteins, SNF2 helicase, Replication proteins, DnaB-2 |
| Structural | Capsid proteins, gp6-like head-tail connector, Tail proteins, Prophage-tail proteins, Tape measure protein, BppU-N, Phage-Mu-F, collagen-like fibers |
| Lysis | *tRNA-W, N, I, G, E, Q, Ile, Leu, Met* — integration hotspot & translation optimization |
| Metabolism | Holin, Lysozyme, SGNH/GDSL Hydrolase, Peptidase-M78, Glyco-hydro-42 |

| **PhageBoost Region8** | Metabolism | Glutamyl-tRNA reductase, baiE (Bile acid 7-alpha-dehydratase |
| --- | --- | --- |
| Regulatory | Transcription regulator |
| Accessory/unknown | DUF4440/DUF3303 domain-containing protein, Transport protein (bmr3) |

| **PhageBoost Region9** | Metabolism | *pucI* (Cytosine permease), Perilipin-3-like |
| --- | --- | --- |
| Regulatory | *arpU*, Prophage P3 protein 2, CI-like repressor |
| Bacteriocin/defense | Bacteriocin immunity protein |
| Accessory/unknown | DUF1398 domain-containing protein, Integron gene cassette protein |
| Integration | *xerC* (Prophage P3 protein 1, integrase) |
| Packaging | SF3 helicase domain-containing protein, DNA replication protein |

**Table 5. Key Genes and Functional Factors of the Prophage-Associated Regions Predicted by PhageBoost (Prokka and Bakta Annotations)**

| **Region** | **Bakta** | **Prokka** | **Length (size)** | **Start-Stop (bp)** |
| --- | --- | --- | --- | --- |
| **PhageBoost Region1** 17,096 bp (338,885 – 355,981 bp) | Glycerol kinase | *glpK* | 1,500 bp | 338,903-340,401 |
| Alpha-glycerophosphate oxidase | *glpO* | 1,830 bp | 340,417-342,245 |
| Aquaporin | *glpF* | 720 bp | 342,263-342,982 |
| MucBP domain-containing protein | hypothetical protein | 3,696 bp | 343,569-347,264 |
| hypothetical protein1) |  | 1,788 bp | 347,266-348,753 |
| DUF1934 domain-containing protein | hypothetical protein | 420 bp | 348,768-349,287 |
| Integral membrane protein | hypothetical protein | 264 bp | 349,536-349,799 |
| hypothetical protein1) |  | 279 bp | 349,901-350,089 |
| hypothetical protein1) |  | 168 bp | 350,319-350,486 |
| Orphan protein | hypothetical protein | 918 bp | 350,483-351,400 |
| hypothetical protein1) |  | 174 bp | 351,407-351,580 |
| ANK-REP-REGION domain-containing protein | hypothetical protein | 543 bp | 352,125-352,667 |
| Integral membrane protein | hypothetical protein | 264 bp | 352,682-352,945 |
| hypothetical protein1) |  | 204 bp | 353,062-353,265 |
| DUSP domain-containing protein | hypothetical protein | 276 bp | 353,354-353,629 |
| Phage protein | hypothetical protein | 387 bp | 353,637-354,033 |
| hypothetical protein1) |  | 156 bp | 354,259-354,414 |
| hypothetical protein1) |  | 147 bp | 354,877-355,023 |
| Imm63 domain-containing protein | hypothetical protein | 408 bp | 355,100-355,507 |
| hypothetical protein1) |  | 147 bp | 355,834-355,980 |

| **Region** | **Bakta** | **Prokka** | **Length (size)** | **Start-Stop (bp)** |
| --- | --- | --- | --- | --- |
| **PhageBoost Region2** 15,476 bp (359,163 – 374,639 bp) | *rhaS* | *rhaR* | 873 bp | 360,024-360,896 |
| HAD family phosphatase | *yidA* | 816 bp | 361,056-361,871 |
| T-box leader | NA | 280 bp | 361,952-362,231 |
| Branched-chain amino acid transport system carrier protein | *brnQ* | 1,377 bp | 362,397-363,773 |
| Na-H-Exchanger domain-containing protein | *napA* | 1,185 bp | 363,818-365,002 |
| hypothetical protein1) |  | 204 bp | 365,387-365,590 |
| hypothetical protein1) |  | 153 bp | 365,825-365,977 |
| *plnL* | hypothetical protein | 669 bp | 366,002-366,670 |
| *plnK* | hypothetical protein | 174 bp | 366,667-366,840 |
| *plnJ* | hypothetical protein | 162 bp | 366,871-367,032 |
| hypothetical protein1) |  | 201 bp | 368,900-369,100 |
| hypothetical protein1) |  | 168 bp | 369,228-369,395 |
| *sunS* | hypothetical protein | 1,200 bp | 369,513-370,712 |
| Bacteriocin immunity protein | hypothetical protein | 747 bp | 370,743-371,489 |
| *plnQ* | hypothetical protein | 189 bp | 371,843-372,031 |
| Bacteriocin plantaricin-A | *plnA* | 147 bp | 372,367-372,513 |
| *plnB* | hypothetical protein | 1,329 bp | 372,704-374,032 |
| Accessory gene regulator A | *agrA_1* | 744 bp | 374,033-374,776 |
| Accessory gene regulator A | *agrA_2* | 744 bp | 374,895-375,638 |

| **Region** | **Bakta** | **Prokka** | **Length (size)** | **Start-Stop (bp)** |
| --- | --- | --- | --- | --- |
| **PhageBoost Region3** 44,712 bp (359,163 – 374,639 bp) | Hydrolase | hypothetical protein | 846 bp | 359,198-360,043 |
| 50S ribosomal protein L11 | *rplK* | 426 bp | 360,152-360,577 |
| 50S ribosomal protein L1 | *rplA* | 690 bp | 360,678-361,367 |
| Ribosomal protein L10 leader | NA | 114 bp | 361,423-361,536 |
| 50S ribosomal protein L10 | *rplJ* | 504 bp | 361,566-362,069 |
| 50S ribosomal protein L7/L12 | *rplL* | 369 bp | 362,131-362,499 |
| hypothetical protein1) |  | 174 bp | 362,500-362,673 |
| Integrase | *xerC* | 1,203 bp | 362,651-363,853 |
| *trnG* | tRNA-Gly(tcc) | 71 bp | 363,933-364,003 |
| hypothetical protein1) |  | 1,164 bp | 364,033-365,196 |
| tRNA-Xxx | NA | 93 bp | 365,290-365,382 |
| hypothetical protein1) |  | 126 bp | 365,395-365,520 |
| tRNA-Xxx | tRNA-Leu(taa) | 84 bp | 365,560-365,643 |
| hypothetical protein1) |  | 177 bp | 365,686-365,862 |
| tRNA-Xxx | NA | 86 bp | 365,888-365,973 |
| hypothetical protein1) |  | 1,047 bp | 366,004-367,050 |
| Thiol peroxidase | hypothetical protein | 369 bp | 367,080-367,448 |
| Peptidase-M78 domain-containing protein | hypothetical protein | 417 bp | 367,521-367,937 |
| *lexA* | *xre* | 363 bp | 367,949-368,311 |
| hypothetical protein1) |  | 231 bp | 368,484-368,714 |
| Prophage P1 protein 10 | hypothetical protein | 315 bp | 368,787-369,101 |
| DNA-binding helix-turn-helix protein | hypothetical protein | 237 bp | 369,139-369,375 |
| hypothetical protein1) |  | 201 bp | 369,522-369,722 |
| hypothetical protein1) |  | 135 bp | 369,722-369,856 |
| Prophage protein | hypothetical protein | 183 bp | 369,881-370,063 |
| HTH cro/C1-type domain-containing protein | hypothetical protein | 555 bp | 370,024-370,678 |
| DNA-binding protein | hypothetical protein | 285 bp | 370,684–370,968 |
| NA | hypothetical protein | 129 bp | 371,079-371,207 |
| NA | hypothetical protein | 168 bp | 371,176-371,343 |
| hypothetical protein1) |  | 387 bp | 371,340-371,726 |
| *recT* | hypothetical protein | 888 bp | 371,723-372,610 |
| DUF3799 domain-containing protein | hypothetical protein | 798, 753 bp | 372,597-373,394 |
| DUF4373 domain-containing protein | hypothetical protein | 933 bp | 373,476-374,408 |
| Prophage protein | hypothetical protein | 288 bp | 374,405-374,592 |
| Glyco-hydro-42 domain-containing protein | hypothetical protein | 531 bp | 374,589-375,220 |
| Prophage protein | hypothetical protein | 534 bp | 375,216-375,749 |
| Prophage P1 protein 24, holliday junction resolvase | hypothetical protein | 420, 288 bp | 375,742-376,161 |
| NA | hypothetical protein | 231 bp | 376,158-376,388 |
| NA | hypothetical protein | 132 bp | 376,391-376,522 |
| DUF2528 domain-containing protein | hypothetical protein | 369 bp | 376,522-376,890 |
| NA | hypothetical protein | 108 bp | 376,890-376,997 |
| hypothetical protein1) |  | 183 bp | 377,011-377,193 |
| Rorf115 protein | hypothetical protein | 348 bp | 377,186-377,533 |
| Phage protein | hypothetical protein | 441 bp | 377,530-377,970 |
| Phage protein | hypothetical protein | 168 bp | 377,967-378,134 |
| *arpU* | hypothetical protein | 462 bp | 378,262-378,723 |
| *trnN* | tRNA-Asn(gtt) | 75 bp | 378,847-378,919 |
| hypothetical protein1) |  | 783 bp | 379,095-379,877 |
| hypothetical protein1) |  | 180 bp | 379,950-380,129 |
| hypothetical protein1) |  | 150 bp | 380,098-380,247 |
| Terminase small subunit | hypothetical protein | 597 bp | 380,287-380,783 |
| Phage terminase large subunit | hypothetical protein | 1,287 bp | 380,767-382,543 |
| Phage portal protein | hypothetical protein | 1,659 bp | 382,543-384,801 |
| Phage-Mu-F domain-containing protein | hypothetical protein | 945 bp | 384,799-385,745 |
| DUF4355 domain-containing protein | hypothetical protein | 648 bp | 385,853-386,500 |
| Phage capsid protein | hypothetical protein | 1,071 bp | 386,514-387,584 |
| Prophage protein | hypothetical protein | 366 bp | 387,599-387,964 |
| Prophage protein | hypothetical protein | 375 bp | 387,918-388,292 |
| Phage tail protein | hypothetical protein | 555 bp | 388,282-388,836 |
| DUF3168 domain-containing protein | hypothetical protein | 387 bp | 388,837-389,223 |
| Phage tail protein | hypothetical protein | 588 bp | 389,235-389,822 |
| Phage protein | hypothetical protein | 513 bp | 389,840-390,352 |
| SNF2 family protein | hypothetical protein | 237 bp | 390,421-390,657 |
| Prophage P2a protein 48 tape measure protein | hypothetical protein | 4,005 bp | 390,657-394,661 |
| Phage tail protein | hypothetical protein | 732 bp | 393,661–394,392 |
| Prophage-tail domain-containing protein | hypothetical protein | 1,899 bp | 394,368-396,266 |
| SGNH/GDSL hydrolase family protein | hypothetical protein | 993 bp | 396,271-397,263 |
| BppU-N domain-containing protein | hypothetical protein | 615 bp | 397,278-397,892 |
| Phage protein | hypothetical protein | 741 bp | 397,898-398,638 |
| hypothetical protein1) |  | 321 bp | 398,639-398,959 |
| *xkdX* | hypothetical protein | 177 bp | 398,959-399,135 |
| Lysozyme | hypothetical protein | 1,149 bp | 399,113-400,761 |
| Bacteriophage protein | hypothetical protein | 297 bp | 400,762-401,058 |
| hypothetical protein1) |  | 405 bp | 401,500-401,904 |
| NA | hypothetical protein | 207 bp | 401,751-401,957 |
| hypothetical protein1) |  | 270 bp | 403,352-403,621 |
| hypothetical protein1) |  | 1,197 bp | 403,678-404,874 |

| **Region** | **Bakta** | **Prokka** | **Length (size)** | **Start-Stop (bp)** |
| --- | --- | --- | --- | --- |
| **PhageBoost Region4** 6,414 bp (1,083,489 – 1,089,903 bp) | Glucose-1-phosphate thymidylyltransferase | *rfbA* | 741 bp | 1,083,611-1,084,351 |
| Cellulase domain-containing protein | hypothetical protein | 1,290 bp | 1,084,374-1,085,663 |
| dTDP-4-dehydrorhamnose 3,5-epimerase | *rfbC* | 582 bp | 1,085,723-1,086,304 |
| dTDP-glucose 4,6-dehydratase | *rmlB* | 1,029 bp | 1,086,314-1,087,342 |
| dTDP-4-dehydrorhamnose reductase | *strL* | 843 bp | 1,087,412-1,088,254 |
| hypothetical protein1) |  | 177 bp | 1,088,343-1,088,519 |
| hypothetical protein1) |  | 486 bp | 1,088,477-1,088,962 |
| hypothetical protein1) |  | 228 bp | 1,089,005-1,089,232 |
| hypothetical protein1) |  | 312 bp | 1,089,229-1,089,540 |
| hypothetical protein1) |  | 228 bp | 1,089,675-1,089,902 |

| **Region** | **Bakta** | **Prokka** | **Length (size)** | **Start-Stop (bp)** |
| --- | --- | --- | --- | --- |
| **PhageBoost Region5** 10,800 bp (1,094,804 – 1,105,604 bp) | Glycosyltransferase, family 1 (GT1) | *mshA* | 930 bp | 1,094,968-1,095,897 |
| Exopolysaccharide phosphotransferase cps2G | hypothetical protein | 999 bp | 1,095,913-1,096,911 |
| hypothetical protein1) |  | 1,140 bp | 1,096,949-1,098,088 |
| hypothetical protein1) |  | 1,551 bp | 1,098,095-1,099,645 |
| hypothetical protein1) |  | 1,026 bp | 1,099,785-1,100,810 |
| RelB/DinJ family addiction module antitoxin | *epsF* | 201 bp | 1,100,935-1,101,135 |
| hypothetical protein1) |  | 669 bp | 1,102,295-1,102,963 |
| hypothetical protein1) |  | 834 bp | 1,103,000-1,103,833 |
| Integrase catalytic domain-containing protein | *insK* | 624 bp | 1,104,021-1,104,644 |
| hypothetical protein1) |  | 258 bp | 1,104,601-1,104,858 |
| hypothetical protein1) |  | 288 bp | 1,104,906-1,105,193 |
| hypothetical protein1) |  | 381 bp | 1,105,223-1,105,603 |

| **Region** | **Bakta** | **Prokka** | **Length (size)** | **Start-Stop (bp)** |
| --- | --- | --- | --- | --- |
| **PhageBoost Region6** 14,663 bp (1,801,149 – 1,815,812 bp) | hypothetical protein1) |  | 201 bp | 1,801,682-1,801,882 |
| Ribosomal protein L11 methyltransferase | *prmA* | 972 bp | 1,801,913-1,802,884 |
| Putative 3-methyladenine DNA glycosylase | Putative 3-methyladenine DNA glycosylase | 630 bp | 1,802,972-1,803,601 |
| L51-S25-CI-B8 domain-containing protein | hypothetical protein | 291 bp | 1,803,668-1,803,958 |
| DUF3892 domain-containing protein | hypothetical protein | 291 bp | 1,804,213-1,804,503 |
| hypothetical protein1) |  | 753 bp | 1,804,812-1,805,564 |
| hypothetical protein1) |  | 195 bp | 1,806,947-1,807,141 |
| hypothetical protein1) |  | 813 bp | 1,807,169-1,808,081 |
| hypothetical protein1) |  | 363 bp | 1,808,032-1,808,394 |
| hypothetical protein1) |  | 669 bp | 1,808,473-1,809,141 |
| HTH cro/C1-type domain-containing protein | hypothetical protein | 1,128 bp | 1,809,119-1,810,246 |
| hypothetical protein |  | 741 bp | 1,810,276-1,811,016 |
| hypothetical protein |  | 330 bp | 1,811,097-1,811,426 |
| *tnp* | IS1182 family transposase ISP2 | 1,653 bp | 1,811,512-1,813,164 |
| hypothetical protein | ISL3 family transposase ISP1 | 360 bp | 1,813,305-1,813,664 |
| Transposase | ISL3 family transposase ISP1 | 423 bp | 1,813,761-1,814,101 |
| hypothetical protein1) |  | 312 bp | 1,814,610-1,814,921 |
| hypothetical protein1) |  | 213 bp | 1,815,599–1,815,811 |

| **Region** | **Bakta** | **Prokka** | **Length (size)** | **Start-Stop (bp)** |
| --- | --- | --- | --- | --- |
| **PhageBoost Region7** 73,909 bp (2,150,891 – 2,224,800 bp) | *gatD* | *gatD* | 681 bp | 2,150,932-2,151,612 |
| Mannose-6-phosphate isomerase | *gmuF* | 966 bp | 2,151,873-2,152,838 |
| Serine-type D-Ala-D-Ala carboxypeptidase | *yfeW* | 1,032 bp | 2,152,915-2,153,946 |
| NA | hypothetical protein | 174 bp | 2,154,013-2,154,186 |
| Branched-chain-amino-acid aminotransferase | *ilvE* | 1,029 bp | 2,154,542-2,156,570 |
| Structural protein | hypothetical protein | 363 bp | 2,155,703-2,156,065 |
| Lipoprotein | hypothetical protein | 972 bp | 2,156,281-2,157,252 |
| ABC transporter, ATP-binding protein | Fatty acid ABC transporter  ATP-binding/permease protein | 1,890 bp | 2,157,267-2,159,156 |
| ABC transporter ATP-binding protein | putative ABC transporter ATP-binding protein | 1,731 bp | 2,159,156-2,160,886 |
| *yxeA* | hypothetical protein | 393 bp | 2,161,114-2,161,506 |
| Prophage Lp2 protein 59 | hypothetical protein | 852 bp | 2,161,729-2,162,580 |
| hypothetical protein1) |  | 159 bp | 2,162,577-2,162,735 |
| Holin | hypothetical protein | 378 bp | 2,163,937-2,164,314 |
| Bacteriophage protein | hypothetical protein | 297 bp | 2,164,301-2,164,597 |
| hypothetical protein1) |  | 1,113 bp | 2,164,598-2,165,710 |
| hypothetical protein1) |  | 240 bp | 2,165,895-2,166,134 |
| Collagen-like protein | hypothetical protein | 1,113 bp | 2,166,131-2,167,253 |
| hypothetical protein1) |  | 2,196 bp | 2,167,328-2,169,523 |
| hypothetical protein1) |  | 258 bp | 2,169,513-2,169,770 |
| Prophage-tail domain-containing protein | hypothetical protein | 1,179 bp | 2,169,767-2,170,945 |
| Phage tail family protein | hypothetical protein | 897 bp | 2,170,945-2,171,841 |
| Prophage P2a protein 48 tape measure protein | hypothetical protein | 4,074 bp | 2,171,851-2,175,924 |
| SNF2 family protein | hypothetical protein | 237 bp | 2,175,924-2,176,160 |
| Phage protein | hypothetical protein | 489 bp | 2,176,253-2,176,741 |
| Phage tail protein | hypothetical protein | 567 bp | 2,176,775-2,177,341 |
| DUF3168 domain-containing protein | hypothetical protein | 387 bp | 2,177,353-2,177,739 |
| Phage tail protein | hypothetical protein | 555 bp | 2,177,741-2,178,295 |
| hypothetical protein1) |  | 375 bp | 2,178,285-2,178,659 |
| Prophage protein | hypothetical protein | 366 bp | 2,178,613-2,178,978 |
| Phage capsid protein | hypothetical protein | 1,059 bp | 2,178,993-2,180,051 |
| DUF4355 domain-containing protein | hypothetical protein | 648 bp | 2,180,068-2,180,715 |
| Phage-Mu-F domain-containing protein | hypothetical protein | 945 bp | 2,180,822-2,181,766 |
| Phage portal protein | hypothetical protein | 1,653 bp | 2,181,769-2,183,421 |
| hypothetical protein1) |  | 702 bp | 2,183,411-2,184,112 |
| hypothetical protein1) |  | 660 bp | 2,184,051-2,184,710 |
| hypothetical protein1) |  | 216 bp | 2,184,740-2,184,955 |
| Terminase small subunit | hypothetical protein | 510 bp | 2,184,915-2,185,424 |
| hypothetical protein | hypothetical protein | 123 bp | 2,185,464-2,185,586 |
| Prophage Lp2 protein 33 | hypothetical protein | 264 bp | 2,185,622-2,185,885 |
| Transposase | hypothetical protein | 180 bp | 2,185,854-2,186,033 |
| NA | hypothetical protein | 174 bp | 2,186,397-2,186,570 |
| hypothetical protein1) |  | 231 bp | 2,186,630-2,186,860 |
| *trnW* | *tRNA-Trp(cca)* | 72 bp | 2,186,913-2,186,984 |
| *trnN* | *tRNA-Asn(gtt)* | 73 bp | 2,187,054-2,187,126 |
| *arpU* | hypothetical protein | 462 bp | 2,187,248-2,187,709 |
| Phage protein | hypothetical protein | 201 bp | 2,187,788-2,187,988 |
| hypothetical protein1) |  | 294 bp | 2,188,019-2,188,312 |
| hypothetical protein1) |  | 132 bp | 2,188,382-2,188,513 |
| Phage protein | hypothetical protein | 312 bp | 2,188,528-2,188,839 |
| hypothetical protein1) |  | 450 bp | 2,188,912-2,189,361 |
| hypothetical protein1) |  | 150 bp | 2,189,385-2,189,534 |
| Prophage Lp2 protein 25 | hypothetical protein | 168 bp | 2,189,537-2,189,704 |
| Prophage Lp2 protein 24 | hypothetical protein | 381 bp | 2,189,697-2,190,077 |
| Prophage Lp1 protein 23 | hypothetical protein | 519 bp | 2,190,074-2,190,592 |
| Glyco-hydro-42 domain-containing protein | hypothetical protein | 531 bp | 2,190,589-2,191,119 |
| Prophage protein | hypothetical protein | 288 bp | 2,191,116-2,191,403 |
| DnaB-2 domain-containing protein | hypothetical protein | 909 bp | 2,191,400-2,192,308 |
| DUF669 domain-containing protein | hypothetical protein | 666 bp | 2,192,475-2,193,140 |
| Nucleotide-binding protein | hypothetical protein | 663 bp | 2,193,143-2,193,805 |
| Phage major capsid protein | hypothetical protein | 510 bp | 2,193,812-2,194,321 |
| Prophage protein | hypothetical protein | 132 bp | 2,194,314-2,194,445 |
| hypothetical protein1) |  | 129 bp | 2,194,578-2,194,706 |
| DUF1508 domain-containing protein | hypothetical protein | 180 bp | 2,194,761-2,194,940 |
| hypothetical protein | hypothetical protein | 156, 198 bp | 2,194,924-2,195,079 |
| XRE family transcriptional regulator | hypothetical protein | 513 bp | 2,195,189-2,195,701 |
| hypothetical protein1) |  | 306 bp | 2,195,769-2,196,074 |
| hypothetical protein1) |  | 141 bp | 2,196,116-2,196,256 |
| HTH-type transcriptional regulator Xre | hypothetical protein | 228 bp | 2,196,253-2,196,480 |
| *lexA* | hypothetical protein | 363 bp | 2,196,609-2,196,971 |
| Peptidase-M78 domain-containing protein | hypothetical protein | 414 bp | 2,196,983-2,197,396 |
| Lipoprotein | hypothetical protein | 336 bp | 2,197,423-2,197,758 |
| type I site-specific deoxyribonuclease | hypothetical protein | 1,062 bp | 2,197,884-2,198,945 |
| *tRNA-Xxx* | *tRNA-Ile(tat)* | 86 bp | 2,198,998-2,199,083 |
| hypothetical protein1) |  | 177 bp | 2,199,109-2,199,285 |
| *tRNA-Xxx* | *tRNA-Leu(taa)* | 84 bp | 2,199,328-2,199,411 |
| hypothetical protein1) |  | 126 bp | 2,199,451-2,199,576 |
| *tRNA-Xxx* | NA | 93 bp | 2,199,589-2,199,681 |
| *trnI* | *tRNA-Met(cat)* | 74 bp | 2,199,696-2,199,769 |
| *trnG* | *tRNA-Gly(tcc)* | 71 bp | 2,199,775-2,199,845 |
| hypothetical protein1) |  | 1,749 bp | 2,199,893-2,201,641 |
| site-specific DNA-methyltransferase (adenine-specific) | hypothetical protein | 915 bp | 2,201,695-2,202,609 |
| Tyr recombinase domain-containing protein | *xerC_1* | 1,122 bp | 2,202,696-2,203,817 |
| *trnE* | *tRNA-Glu(ctc)* | 73 bp | 2,204,056-2,204,118 |
| Prophage Lp3 protein 24 | hypothetical protein | 222, 207 bp | 2,204,168-2,204,389 |
| *trnQ* | *tRNA-Gln(ctg)* | 73, 75 bp | 2,204,509-2,204,581 |
| TMhelix containing protein | hypothetical protein | 306 bp | 2,204,794-2,205,099 |
| Prophage protein | hypothetical protein | 372 bp | 2,205,182-2,205,553 |
| Phage gp6-like head-tail connector protein | hypothetical protein | 270 bp | 2,205,736-2,205,973 |
| Phage major capsid protein | hypothetical protein | 1,503 bp | 2,206,068-2,207,570 |
| Phage portal protein | hypothetical protein | 1,101 bp | 2,207,592-2,208,692 |
| Terminase large subunit | hypothetical protein | 1,704 bp | 2,208,847-2,210,550 |
| Phage terminase small subunit P27 family | hypothetical protein | 474 bp | 2,210,547-2,211,020 |
| NA | hypothetical protein | 168 bp | 2,211,613-2,211,780 |
| Endonuclease | hypothetical protein | 390 bp | 2,211,803-2,212,192 |
| Phage tail protein | hypothetical protein | 339, 345 bp | 2,212,185-2,212,523 |
| Phage protein | hypothetical protein | 192 bp | 2,212,510-2,212,701 |
| Phage protein | hypothetical protein | 474 bp | 2,212,723-2,213,196 |
| Virulence protein | hypothetical protein | 1,395 bp | 2,213,342-2,214,736 |
| Replication protein | hypothetical protein | 801 bp | 2,214,736-2,215,536 |
| Phage protein | hypothetical protein | 225 bp | 2,215,533-2,215,787 |
| hypothetical protein | NA | 144 bp | 2,215,754-2,215,897 |
| hypothetical protein | NA | 108 bp | 2,215,908-2,216,015 |
| DNA-binding protein | hypothetical protein | 189 bp | 2,216,058-2,216,246 |
| hypothetical protein1) |  | 204 bp | 2,216,227-2,216,430 |
| hypothetical protein1) |  | 567 bp | 2,216,563-2,217,127 |
| Tyr recombinase domain-containing protein | *xerC_2* | 1,158 bp | 2,217,182-2,218,339 |
| NA | hypothetical protein | 234 bp | 2,218,830-2,219,063 |
| NA | hypothetical protein | 273 bp | 2,219,088-2,219,360 |
| *marR* | hypothetical protein | 486 bp | 2,219,409-2,219,894 |
| Chromosome partition protein Smc | *smc* | 1,977 bp | 2,219,949-2,221,925 |
| hypothetical protein | hypothetical protein | 2,775 bp | 2,222,025-2,224,799 |

| **Region** | **Bakta** | **Prokka** | **Length (size)** | **Start-Stop (bp)** |
| --- | --- | --- | --- | --- |
| **PhageBoost Region8** 6,672 bp (2,820,823 – 2,827,495 bp) | Glutamyl-tRNA reductase | hypothetical protein | 603 bp | 2,821,065-2,821,667 |
| Bile acid 7-alpha-dehydratase | *baiE* | 444 bp | 2,821,667-2,822,110 |
| Transport protein | *bmr3* | 1,455 bp | 2,822,235-2,823,689 |
| DUF4440 domain-containing protein | hypothetical protein | 378 bp | 2,823,701-2,824,078 |
| Transcription regulator | hypothetical protein | 585 bp | 2,824,388-2,824,972 |
| hypothetical protein1) |  | 165 bp | 2,825,554-2,825,718 |
| hypothetical protein1) |  | 219 bp | 2,825,857-2,826,075 |
| hypothetical protein1) |  | 213 bp | 2,826,133-2,826,345 |
| hypothetical protein1) |  | 195 bp | 2,826,623-2,826,817 |
| DUF3303 domain-containing protein | hypothetical protein | 249 bp | 2,827,246-2,827,494 |

| **Region** | **Bakta** | **Prokka** | **Length (size)** | **Start-Stop (bp)** |
| --- | --- | --- | --- | --- |
| **PhageBoost Region9** 13,375 bp (2,993,904 – 3,007,279 bp) | hypothetical protein1) |  | 282 bp | 2,993,924-2,994,205 |
| Integron gene cassette protein | hypothetical protein | 183 bp | 2,994,441-2,994,623 |
| hypothetical protein1) |  | 294 bp | 2,994,675-2,994,968 |
| DUF1398 domain-containing protein | hypothetical protein | 387 bp | 2,995,043-2,995,429 |
| Cytosine permease | *pucI* | 1,404 bp | 2,995,475-2,996,878 |
| *arpU* | hypothetical protein | 327 bp | 2,997,295-2,997,621 |
| hypothetical protein1) |  | 243 bp | 2,998,562-2,998,804 |
| Prophage protein | hypothetical protein | 414 bp | 2,998,910-2,999,323 |
| Phage protein | hypothetical protein | 372 bp | 2,999,325-2,999,696 |
| hypothetical protein1) |  | 177 bp | 2,999,779-2,999,955 |
| Phage protein | hypothetical protein | 459 bp | 2,999,982-3,000,440 |
| SF3 helicase domain-containing protein | hypothetical protein | 1,503 bp | 3,000,949-3,002,451 |
| DNA replication protein | hypothetical protein | 780 bp | 3,002,466-3,003,245 |
| Bacteriocin immunity protein | hypothetical protein | 222 bp | 3,003,258-3,003,479 |
| Perilipin-3-like | hypothetical protein | 429 bp | 3,003,472-3,003,900 |
| hypothetical protein1) |  | 105 bp | 3,004,042-3,004,146 |
| hypothetical protein1) |  | 459 bp | 3,004,647-3,005,105 |
| hypothetical protein1) |  | 246 bp | 3,005,120-3,005,335 |
| hypothetical protein1) |  | 195 bp | 3,005,347-3,005,541 |
| Prophage P3 protein 2, CI-like repressor | hypothetical protein | 381 bp | 3,005,700-3,006,080 |
| Prophage P3 protein 1, integrase | *xerC* | 1,149 bp | 3,006,130-3,007,278 |

1) Means genes or factors identified only by either Prokka or Bakta.

Batka & Prokka with enhanced sequence translation; NA, not applicable.
